# Supplementary material for: Rapid screening of pharmaceutical products for elemental impurities by a high-resolution portable energy dispersive X-ray fluorescence spectrometer using an efficient fundamental parameter method
Source: Royal Society of Chemistry journal article supplement (doi:10.1039/d2an01749k), 2023-01-01
Supplement: d2an01749k1.pdf [file d2an01749k1.pdf]

## Supplementary Material

Rapid screening pharmaceutical products for elemental impurities by high-resolution portable energy dispersive X-ray fluorescence spectrometer using efficient fundamental parameter method

Li Zhu,<sup>‡a</sup> Yun Teng,<sup>‡c</sup> Weidan Han,<sup>d</sup> Lihui Yin<sup>\*a</sup> and Xu Teng<sup>\*b</sup>

<sup>a</sup> Key Laboratory for Quality Research and Evaluation of Chemical Drugs, National Institutes for Food and Drug Control, Beijing 100029, China

<sup>b</sup> Qingyuan People's Hospital, The Sixth Affiliated Hospital of Guangzhou Medical University, Qingyuan 511518, China

<sup>c</sup> State Key Laboratory of Information Photonics and Optical Communications, Beijing University of Posts and Telecommunications, Beijing 100876, China

<sup>d</sup> Beijing Ancoren Technology Co., Ltd., Beijing 101102, China

*\*Corresponding author*

*E-mail: xu0601@163.com (X. Teng), yinlihui@nifdc.org.cn (L. Yin)*

*‡These authors contributed equally to this work*

## Contents

Table S1 The concentrations of each element in the solid standard stock sample by using ICP-MS reference analysis

Table S2. PDE for oral drug products and concentration limits at 10 g maximum daily intake of 22 elemental impurities

Table S3. Sample information

Table S4. Results of homogeneity verification

Table S5. Accuracy and precision results for Pd and Cd in the cellulose matrix

Table S6. Accuracy and precision results for 20 elemental impurities in the cellulose matrix

Table S7. Linearity results of the proposed EDXRF method for the screening of 20 elemental impurities

Fig. S1 Linearity results of the proposed EDXRF method for the screening of Sb (A), Mo (B), Cu (C), Sn (D), and Cr (E)

Table S8. Accuracy and precision results for Pd and Cd in the contezolid matrix

Table S9. Accuracy and precision results for 19 elemental impurities in the contezolid matrix

Table S10. Accuracy and precision results for Pd and Cd in the aztreonam matrix

Table S11. Accuracy and precision results for 20 elemental impurities in the aztreonam matrix

Table S12. Determination of elemental impurities in drug products.

**Table S1** The concentrations of each element in the solid standard stock sample by using ICP-MS reference analysis

| Elements | Concentration ( $\mu\text{g/g}$ ) |       |       |
|----------|-----------------------------------|-------|-------|
|          | 1                                 | 2     | Mean  |
| V        | 50.66                             | 51.39 | 51.02 |
| Cr       | 51.32                             | 50.13 | 50.73 |
| Co       | 49.01                             | 54.23 | 51.62 |
| Ni       | 49.37                             | 48.13 | 48.75 |
| Cu       | 52.06                             | 51.90 | 51.98 |
| As       | 49.78                             | 48.57 | 49.17 |
| Se       | 45.82                             | 50.44 | 48.13 |
| Mo       | 52.85                             | 50.42 | 51.64 |
| Ru       | 48.20                             | 50.30 | 49.25 |
| Rh       | 49.64                             | 50.72 | 50.18 |
| Pd       | 50.01                             | 51.22 | 50.61 |
| Ag       | 51.49                             | 49.77 | 50.63 |
| Cd       | 48.14                             | 49.64 | 48.89 |
| Sn       | 49.76                             | 48.93 | 49.35 |
| Sb       | 49.71                             | 49.56 | 49.63 |
| Os       | 50.99                             | 50.91 | 50.95 |
| Ir       | 49.01                             | 52.82 | 50.91 |
| Pt       | 49.46                             | 49.54 | 49.50 |
| Au       | 49.30                             | 49.20 | 49.25 |
| Hg       | 49.68                             | 48.44 | 49.06 |
| Tl       | 49.67                             | 51.23 | 50.45 |
| Pb       | 50.66                             | 49.35 | 50.01 |

**Table S2** PDE for oral drug products and concentration limits at 10 g maximum daily intake of 22 elemental impurities

| Elements | PDE for oral drug products ( $\mu\text{g}/\text{day}$ ) | Concentration limits ( $\mu\text{g}/\text{g}$ ) at 10 g maximum daily intake |
|----------|---------------------------------------------------------|------------------------------------------------------------------------------|
| Cd       | 5                                                       | 0.5                                                                          |
| Pb       | 5                                                       | 0.5                                                                          |
| As       | 15                                                      | 1.5                                                                          |
| Hg       | 30                                                      | 3                                                                            |
| Co       | 50                                                      | 5                                                                            |
| V        | 100                                                     | 10                                                                           |
| Ni       | 200                                                     | 20                                                                           |
| Tl       | 8                                                       | 0.8                                                                          |
| Au       | 100                                                     | 10                                                                           |
| Pd       | 100                                                     | 10                                                                           |
| Ir       | 100                                                     | 10                                                                           |
| Os       | 100                                                     | 10                                                                           |
| Rh       | 100                                                     | 10                                                                           |
| Ru       | 100                                                     | 10                                                                           |
| Se       | 150                                                     | 15                                                                           |
| Ag       | 150                                                     | 15                                                                           |
| Pt       | 100                                                     | 10                                                                           |
| Sb       | 1200                                                    | 120                                                                          |
| Mo       | 3000                                                    | 300                                                                          |
| Cu       | 3000                                                    | 300                                                                          |
| Sn       | 6000                                                    | 600                                                                          |
| Cr       | 11000                                                   | 1100                                                                         |

**Table S3** Sample information

| Sample type         | Matrix material | Elements for detection                                                                  | Concentration ( $\mu\text{g/g}$ ) |
|---------------------|-----------------|-----------------------------------------------------------------------------------------|-----------------------------------|
| Calibration sample  | Cellulose       | Cr, Ni, Co, V, Ni, Pb, As,<br>Hg, Tl, Au, Pd, Ir, Os, Rh,<br>Ru, Se, Cu, Ag, Sb, Mo, Sn | 1.0, 2.0, 5.0, 10                 |
| Verification sample | Cellulose       | Cd, Pb                                                                                  | 0.2, 0.5, 1.0, 2.0, 5.0, 10       |
|                     | Aztreonam, MRX  | Cr, Ni, Co, V, Ni, Pb, As,<br>Hg, Tl, Au, Pd, Ir, Os, Rh,<br>Ru, Se, Cu, Ag, Sb, Mo, Sn | 1.0, 2.0, 5.0, 10                 |
|                     | Aztreonam, MRX  | Cd, Pb                                                                                  | 0.2, 0.5, 1.0, 2.0, 5.0, 10       |

**Table S4** Results of homogeneity verification

| Elements | Concentration ( $\mu\text{g/g}$ ) |       |       |       |       |       |       |       |       | Mean  | %RSD |
|----------|-----------------------------------|-------|-------|-------|-------|-------|-------|-------|-------|-------|------|
|          | 1                                 | 2     | 3     | 4     | 5     | 6     | 7     | 8     | 9     |       |      |
| Cd       | 49.45                             | 49.51 | 49.67 | 49.67 | 49.47 | 49.62 | 49.50 | 49.58 | 49.49 | 49.55 | 0.17 |
| Pb       | 46.26                             | 45.83 | 47.24 | 47.29 | 46.08 | 46.72 | 45.57 | 46.52 | 46.66 | 46.46 | 1.27 |
| As       | 55.14                             | 56.07 | 55.05 | 54.94 | 55.98 | 55.79 | 56.38 | 55.50 | 55.53 | 55.60 | 0.89 |
| Hg       | 45.62                             | 45.96 | 45.80 | 45.97 | 45.88 | 45.70 | 45.64 | 45.45 | 45.75 | 45.75 | 0.37 |
| Co       | 53.25                             | 53.16 | 53.47 | 53.46 | 53.23 | 53.44 | 53.66 | 53.48 | 53.46 | 53.40 | 0.29 |
| V        | 49.51                             | 49.39 | 48.84 | 48.82 | 49.55 | 49.22 | 49.52 | 49.59 | 48.84 | 49.25 | 0.67 |
| Ni       | 52.92                             | 53.09 | 53.08 | 52.95 | 53.09 | 52.99 | 52.94 | 53.05 | 53.11 | 53.02 | 0.14 |
| Tl       | 46.36                             | 46.25 | 46.44 | 46.56 | 46.36 | 46.25 | 46.50 | 45.99 | 46.36 | 46.34 | 0.36 |
| Au       | 56.27                             | 56.20 | 56.30 | 56.44 | 56.57 | 56.56 | 56.53 | 56.56 | 56.28 | 56.41 | 0.26 |
| Pd       | 53.06                             | 52.94 | 53.03 | 53.16 | 53.06 | 53.17 | 52.96 | 53.06 | 53.20 | 53.07 | 0.17 |
| Ir       | 45.46                             | 45.75 | 44.97 | 44.70 | 43.91 | 46.29 | 44.16 | 45.76 | 46.68 | 45.30 | 2.07 |
| Os       | 44.70                             | 44.34 | 44.54 | 44.79 | 45.12 | 44.53 | 44.59 | 44.84 | 44.68 | 44.68 | 0.50 |
| Rh       | 54.40                             | 54.55 | 54.53 | 54.54 | 54.69 | 54.46 | 54.43 | 54.39 | 54.63 | 54.51 | 0.19 |
| Ru       | 57.32                             | 57.85 | 57.90 | 57.61 | 57.32 | 57.46 | 57.68 | 57.40 | 57.42 | 57.55 | 0.38 |
| Se       | 55.99                             | 56.45 | 56.14 | 56.06 | 56.29 | 56.15 | 57.01 | 56.26 | 56.20 | 56.28 | 0.54 |
| Ag       | 51.51                             | 51.74 | 51.43 | 51.73 | 51.70 | 51.75 | 51.53 | 51.61 | 51.54 | 51.62 | 0.23 |
| Pt       | 42.26                             | 42.15 | 41.44 | 42.71 | 41.69 | 43.53 | 39.69 | 41.69 | 42.07 | 41.91 | 2.49 |
| Sb       | 46.47                             | 46.63 | 46.15 | 46.49 | 46.22 | 46.16 | 46.32 | 46.30 | 46.45 | 46.36 | 0.36 |
| Mo       | 45.31                             | 45.33 | 45.22 | 45.27 | 45.14 | 45.13 | 45.52 | 45.26 | 45.26 | 45.27 | 0.26 |
| Cu       | 57.02                             | 56.45 | 56.46 | 56.71 | 56.93 | 56.89 | 57.08 | 56.89 | 57.13 | 56.84 | 0.44 |
| Sn       | 48.97                             | 48.87 | 48.73 | 48.92 | 48.82 | 48.66 | 49.16 | 48.82 | 48.39 | 48.82 | 0.44 |
| Cr       | 51.6                              | 51.74 | 51.52 | 51.76 | 51.25 | 51.26 | 51.42 | 51.58 | 51.45 | 51.51 | 0.36 |

**Table S5** Accuracy and precision results for Pd and Cd in the cellulose matrix

| Elements | Concentration<br>( $\mu\text{g/g}$ ) | Concentration |        |       |       |        |        |
|----------|--------------------------------------|---------------|--------|-------|-------|--------|--------|
|          |                                      | 0.2           | 0.5    | 1.0   | 2.0   | 5.0    | 10     |
| Pb       | 1                                    | 0.26          | 0.55   | 1.03  | 1.94  | 5.75   | 11.03  |
|          | 2                                    | 0.30          | 0.48   | 0.94  | 2.13  | 6.00   | 10.89  |
|          | 3                                    | 0.22          | 0.53   | 0.95  | 2.12  | 6.05   | 10.95  |
|          | 4                                    | 0.27          | 0.46   | 0.94  | 1.96  | 5.15   | 10.75  |
|          | 5                                    | 0.22          | 0.55   | 0.96  | 1.91  | 5.82   | 10.38  |
|          | 6                                    | 0.31          | 0.47   | 1.08  | 1.94  | 5.29   | 10.95  |
|          | Mean                                 | 0.26          | 0.50   | 0.98  | 2.00  | 5.68   | 10.83  |
|          | RSD (%)                              | 14.31         | 8.21   | 6.14  | 4.98  | 6.58   | 2.19   |
|          | Recovery (%)                         | 130.42        | 100.93 | 98.27 | 99.94 | 113.57 | 108.25 |
| Cd       | 1                                    | 0.19          | 0.50   | 0.91  | 2.01  | 5.07   | 9.23   |
|          | 2                                    | 0.20          | 0.49   | 0.94  | 1.96  | 4.79   | 9.16   |
|          | 3                                    | 0.26          | 0.56   | 0.90  | 1.99  | 4.65   | 9.12   |
|          | 4                                    | 0.20          | 0.50   | 0.94  | 1.90  | 4.67   | 9.19   |
|          | 5                                    | 0.23          | 0.47   | 0.98  | 2.03  | 4.79   | 8.99   |
|          | 6                                    | 0.24          | 0.56   | 0.97  | 2.06  | 4.77   | 9.08   |
|          | Mean                                 | 0.22          | 0.51   | 0.94  | 1.99  | 4.79   | 9.13   |
|          | RSD (%)                              | 12.12         | 7.54   | 3.44  | 2.82  | 3.16   | 0.97   |
|          | Recovery (%)                         | 110.08        | 102.33 | 93.95 | 99.65 | 95.81  | 91.33  |

**Table S6** Accuracy and precision results for 20 elemental impurities in the cellulose matrix

| Elements     | Concentration<br>( $\mu\text{g/g}$ ) | 1      | 2      | 5      | 10           | Elements | Concentration<br>( $\mu\text{g/g}$ ) | 1      | 2      | 5    | 10    |
|--------------|--------------------------------------|--------|--------|--------|--------------|----------|--------------------------------------|--------|--------|------|-------|
| Hg           | 1                                    | 0.97   | 2.02   | 5.09   | 10.89        | As       | 1                                    | 0.94   | 2.33   | 4.62 | 10.46 |
|              | 2                                    | 0.93   | 2.18   | 5.28   | 10.49        |          | 2                                    | 0.82   | 2.33   | 3.98 | 10.46 |
|              | 3                                    | 1.17   | 2.29   | 5.09   | 10.83        |          | 3                                    | 1.04   | 2.00   | 5.02 | 10.03 |
|              | 4                                    | 1.31   | 2.39   | 5.22   | 11.11        |          | 4                                    | 0.93   | 2.08   | 4.66 | 9.45  |
|              | 5                                    | 1.17   | 2.11   | 5.49   | 11.07        |          | 5                                    | 1.06   | 2.26   | 4.72 | 9.68  |
|              | 6                                    | 0.94   | 2.09   | 5.07   | 11.06        |          | 6                                    | 0.95   | 2.06   | 4.87 | 9.69  |
|              | Mean                                 | 1.08   | 2.18   | 5.21   | 10.91        |          | Mean                                 | 0.96   | 2.17   | 4.64 | 9.96  |
|              | RSD (%)                              | 14.48  | 6.30   | 3.14   | 2.13         |          | RSD (%)                              | 9.06   | 6.76   | 7.74 | 4.29  |
| Recovery (%) | 108.31                               | 109.02 | 104.12 | 109.09 | Recovery (%) | 95.57    | 108.72                               | 92.88  | 99.62  |      |       |
| Co           | 1                                    | 0.71   | 2.14   | 5.48   | 11.64        | V        | 1                                    | 1.05   | 1.94   | 6.02 | 10.31 |
|              | 2                                    | 0.64   | 2.20   | 5.26   | 11.75        |          | 2                                    | 0.88   | 2.00   | 6.29 | 9.93  |
|              | 3                                    | 0.78   | 2.18   | 5.67   | 11.63        |          | 3                                    | 1.05   | 2.18   | 6.07 | 10.38 |
|              | 4                                    | 0.68   | 2.05   | 5.23   | 11.33        |          | 4                                    | 1.16   | 2.12   | 6.47 | 10.30 |
|              | 5                                    | 0.85   | 2.08   | 5.64   | 11.55        |          | 5                                    | 1.12   | 2.22   | 6.43 | 10.34 |
|              | 6                                    | 0.80   | 2.11   | 5.60   | 11.87        |          | 6                                    | 0.89   | 2.09   | 6.49 | 10.05 |
|              | Mean                                 | 0.74   | 2.13   | 5.48   | 11.63        |          | Mean                                 | 1.02   | 2.09   | 6.29 | 11.37 |
|              | RSD (%)                              | 10.40  | 2.76   | 3.54   | 1.58         |          | RSD (%)                              | 11.03  | 5.01   | 3.25 | 1.78  |
| Recovery (%) | 74.17                                | 106.31 | 109.62 | 116.28 | Recovery (%) | 102.47   | 104.59                               | 125.88 | 102.17 |      |       |
| Ni           | 1                                    | 0.86   | 2.16   | 6.94   | 11.45        | Tl       | 1                                    | 0.90   | 1.87   | 4.74 | 9.20  |
|              | 2                                    | 0.93   | 2.27   | 6.82   | 11.45        |          | 2                                    | 1.00   | 1.97   | 4.56 | 9.27  |
|              | 3                                    | 1.04   | 2.12   | 6.64   | 11.64        |          | 3                                    | 0.94   | 1.83   | 4.59 | 9.14  |
|              | 4                                    | 0.94   | 2.16   | 6.85   | 11.73        |          | 4                                    | 1.10   | 1.92   | 4.52 | 9.50  |
|              | 5                                    | 0.90   | 2.24   | 6.59   | 11.58        |          | 5                                    | 0.98   | 1.93   | 4.57 | 9.22  |
|              | 6                                    | 0.85   | 2.10   | 6.62   | 11.31        |          | 6                                    | 1.01   | 1.86   | 4.37 | 9.28  |
|              | Mean                                 | 0.92   | 2.17   | 6.74   | 11.53        |          | Mean                                 | 0.99   | 1.90   | 4.56 | 9.27  |
|              | RSD (%)                              | 7.44   | 3.05   | 2.14   | 1.32         |          | RSD (%)                              | 6.72   | 2.76   | 2.61 | 1.35  |
| Recovery (%) | 91.98                                | 108.65 | 134.86 | 115.27 | Recovery (%) | 98.91    | 94.83                                | 91.14  | 92.67  |      |       |
| Au           | 1                                    | 0.78   | 1.80   | 5.08   | 10.11        | Pd       | 1                                    | 0.93   | 2.12   | 5.21 | 9.52  |
|              | 2                                    | 0.79   | 2.12   | 5.17   | 10.31        |          | 2                                    | 0.89   | 2.02   | 5.00 | 9.59  |
|              | 3                                    | 0.96   | 1.97   | 4.80   | 10.44        |          | 3                                    | 0.91   | 2.03   | 4.84 | 9.47  |
|              | 4                                    | 1.24   | 2.05   | 5.00   | 10.23        |          | 4                                    | 0.97   | 2.06   | 4.96 | 9.55  |



|    |              |       |        |        |        |    |              |        |        |        |        |
|----|--------------|-------|--------|--------|--------|----|--------------|--------|--------|--------|--------|
|    | 5            | 1.11  | 2.46   | 4.94   | 10.04  |    | 5            | 0.92   | 2.08   | 4.94   | 9.51   |
|    | 6            | 0.90  | 1.96   | 4.80   | 10.19  |    | 6            | 0.97   | 2.10   | 4.96   | 9.64   |
|    | Mean         | 0.96  | 2.06   | 4.96   | 10.22  |    | Mean         | 0.93   | 2.07   | 4.98   | 9.55   |
|    | RSD (%)      | 18.90 | 10.88  | 3.02   | 1.40   |    | RSD (%)      | 3.23   | 1.92   | 2.44   | 0.64   |
|    | Recovery (%) | 96.23 | 103.04 | 99.28  | 102.20 |    | Recovery (%) | 93.02  | 103.26 | 99.67  | 95.45  |
| Ir | 1            | 0.89  | 1.94   | 5.42   | 10.41  | Os | 1            | 0.77   | 2.03   | 5.09   | 10.95  |
|    | 2            | 1.05  | 2.17   | 5.20   | 11.07  |    | 2            | 1.08   | 2.02   | 5.17   | 10.80  |
|    | 3            | 0.74  | 2.14   | 5.10   | 10.80  |    | 3            | 1.05   | 1.79   | 4.99   | 11.09  |
|    | 4            | 1.05  | 1.79   | 5.07   | 11.40  |    | 4            | 0.87   | 1.98   | 5.42   | 10.79  |
|    | 5            | 0.82  | 1.96   | 5.35   | 10.76  |    | 5            | 0.95   | 1.82   | 5.04   | 10.38  |
|    | 6            | 0.91  | 1.74   | 4.97   | 11.05  |    | 6            | 0.97   | 1.81   | 5.08   | 11.05  |
|    | Mean         | 0.91  | 1.96   | 5.19   | 10.92  |    | Mean         | 0.95   | 1.91   | 5.13   | 10.84  |
|    | RSD (%)      | 13.48 | 8.94   | 3.36   | 3.10   |    | RSD (%)      | 12.03  | 5.94   | 2.95   | 2.40   |
|    | Recovery (%) | 90.85 | 97.84  | 103.75 | 109.15 |    | Recovery (%) | 94.75  | 95.49  | 102.66 | 108.42 |
| Rh | 1            | 0.91  | 2.15   | 4.85   | 9.55   | Ru | 1            | 1.06   | 2.32   | 5.23   | 9.87   |
|    | 2            | 0.95  | 2.06   | 4.55   | 9.22   |    | 2            | 0.97   | 2.26   | 4.95   | 9.47   |
|    | 3            | 0.96  | 2.12   | 4.64   | 8.96   |    | 3            | 1.02   | 2.27   | 4.96   | 9.85   |
|    | 4            | 1.00  | 2.12   | 4.78   | 9.39   |    | 4            | 1.02   | 2.16   | 5.14   | 9.76   |
|    | 5            | 0.96  | 2.28   | 4.81   | 9.11   |    | 5            | 1.02   | 2.28   | 5.23   | 9.69   |
|    | 6            | 1.02  | 2.07   | 4.81   | 8.97   |    | 6            | 1.07   | 2.23   | 5.27   | 9.72   |
|    | Mean         | 0.97  | 2.13   | 4.74   | 9.20   |    | Mean         | 1.02   | 2.25   | 5.13   | 9.73   |
|    | RSD (%)      | 4.13  | 3.81   | 2.48   | 2.54   |    | RSD (%)      | 3.48   | 2.37   | 2.75   | 1.48   |
|    | Recovery (%) | 96.55 | 106.61 | 94.81  | 91.99  |    | Recovery (%) | 102.32 | 112.72 | 102.60 | 97.25  |
| Se | 1            | 0.80  | 2.13   | 5.94   | 11.69  | Ag | 1            | 0.89   | 2.04   | 4.90   | 10.05  |
|    | 2            | 0.89  | 2.09   | 5.54   | 11.27  |    | 2            | 0.79   | 1.93   | 4.69   | 10.10  |
|    | 3            | 0.92  | 2.14   | 5.70   | 11.24  |    | 3            | 0.87   | 1.96   | 4.54   | 9.98   |
|    | 4            | 0.74  | 2.20   | 5.60   | 11.28  |    | 4            | 0.83   | 1.80   | 4.60   | 10.07  |
|    | 5            | 0.84  | 2.00   | 5.60   | 11.53  |    | 5            | 0.84   | 1.96   | 4.59   | 9.99   |
|    | 6            | 0.77  | 2.16   | 5.51   | 11.45  |    | 6            | 0.86   | 1.96   | 4.73   | 10.02  |
|    | Mean         | 0.83  | 2.12   | 5.65   | 11.41  |    | Mean         | 0.85   | 1.94   | 4.67   | 10.03  |
|    | RSD (%)      | 8.48  | 3.22   | 2.84   | 1.57   |    | RSD (%)      | 4.20   | 4.11   | 2.75   | 0.48   |
|    | Recovery (%) | 82.78 | 105.93 | 112.95 | 114.10 |    | Recovery (%) | 84.87  | 97.13  | 93.48  | 100.34 |
| Pt | 1            | 0.87  | 2.12   | 5.44   | 9.99   | Sb | 1            | 1.19   | 2.34   | 5.08   | 10.51  |
|    | 2            | 1.36  | 2.22   | 5.46   | 10.40  |    | 2            | 1.12   | 2.05   | 5.03   | 10.43  |
|    | 3            | 1.07  | 2.31   | 5.16   | 10.20  |    | 3            | 1.20   | 2.06   | 4.97   | 11.23  |

|    |              |        |        |        |        |    |              |        |        |        |        |
|----|--------------|--------|--------|--------|--------|----|--------------|--------|--------|--------|--------|
|    | 4            | 1.15   | 2.17   | 5.59   | 10.35  |    | 4            | 1.19   | 2.26   | 4.94   | 10.70  |
|    | 5            | 1.46   | 2.38   | 5.47   | 9.82   |    | 5            | 1.29   | 2.16   | 5.58   | 10.99  |
|    | 6            | 1.20   | 2.05   | 5.37   | 9.98   |    | 6            | 1.13   | 2.18   | 5.45   | 10.72  |
|    | Mean         | 1.19   | 2.21   | 5.41   | 10.12  |    | Mean         | 1.19   | 2.18   | 5.18   | 10.76  |
|    | RSD (%)      | 17.54  | 5.59   | 2.62   | 2.29   |    | RSD (%)      | 4.99   | 5.17   | 5.21   | 2.79   |
|    | Recovery (%) | 118.57 | 110.48 | 108.28 | 101.22 |    | Recovery (%) | 118.71 | 108.82 | 103.50 | 107.64 |
| Mo | 1            | 1.07   | 2.48   | 5.28   | 10.92  | Sn | 1            | 0.77   | 1.90   | 4.80   | 8.92   |
|    | 2            | 1.10   | 2.33   | 4.68   | 10.50  |    | 2            | 0.89   | 1.94   | 4.57   | 9.10   |
|    | 3            | 1.07   | 2.07   | 4.89   | 10.81  |    | 3            | 0.81   | 1.88   | 4.81   | 9.21   |
|    | 4            | 1.32   | 2.12   | 4.71   | 10.66  |    | 4            | 0.82   | 1.83   | 4.75   | 8.98   |
|    | 5            | 1.13   | 1.99   | 5.39   | 9.98   |    | 5            | 0.78   | 2.04   | 4.72   | 9.03   |
|    | 6            | 1.31   | 2.41   | 4.96   | 10.38  |    | 6            | 0.87   | 1.99   | 4.59   | 9.13   |
|    | Mean         | 1.17   | 2.23   | 4.99   | 10.54  |    | Mean         | 0.82   | 1.93   | 4.70   | 9.06   |
|    | RSD (%)      | 10.11  | 8.96   | 5.89   | 3.21   |    | RSD (%)      | 5.86   | 3.93   | 2.19   | 1.17   |
|    | Recovery (%) | 116.65 | 111.60 | 99.72  | 105.42 |    | Recovery (%) | 82.32  | 96.43  | 94.06  | 90.62  |
| Cr | 1            | 1.25   | 2.36   | 5.68   | 11.37  | Cu | 1            | 0.89   | 2.57   | 5.51   | 11.20  |
|    | 2            | 1.15   | 2.46   | 5.60   | 10.73  |    | 2            | 0.94   | 2.92   | 5.06   | 11.62  |
|    | 3            | 1.07   | 2.18   | 4.99   | 11.29  |    | 3            | 1.05   | 3.05   | 5.21   | 11.85  |
|    | 4            | 0.97   | 2.40   | 5.44   | 11.46  |    | 4            | 1.08   | 3.12   | 5.68   | 11.76  |
|    | 5            | 0.94   | 2.25   | 5.46   | 11.36  |    | 5            | 1.15   | 2.80   | 5.28   | 11.82  |
|    | 6            | 1.08   | 2.50   | 5.51   | 11.32  |    | 6            | 1.22   | 2.87   | 5.29   | 11.86  |
|    | Mean         | 1.08   | 2.36   | 5.45   | 11.26  |    | Mean         | 1.05   | 2.89   | 5.34   | 11.69  |
|    | RSD (%)      | 10.59  | 5.15   | 4.44   | 2.34   |    | RSD (%)      | 11.70  | 6.74   | 4.15   | 2.17   |
|    | Recovery (%) | 107.64 | 117.92 | 108.92 | 112.55 |    | Recovery (%) | 105.43 | 144.47 | 106.77 | 116.85 |

**Table S7** Linearity results of the proposed EDXRF method for the screening of 15 elemental impurities

| Elements | 1 µg/g | 2 µg/g | 5 µg/g | 10 µg/g | Regression equations   | R-value |
|----------|--------|--------|--------|---------|------------------------|---------|
| Hg       | 1.08   | 2.18   | 5.21   | 10.91   | $y = 1.0894x - 0.0572$ | 0.99965 |
| Ni       | 0.92   | 2.17   | 6.74   | 11.53   | $y = 1.1865x + 0.0006$ | 0.99373 |
| As       | 0.96   | 2.17   | 4.64   | 9.96    | $y = 0.986x - 0.0046$  | 0.99860 |
| V        | 1.02   | 2.09   | 6.29   | 11.37   | $y = 1.1609x - 0.0316$ | 0.99725 |
| Co       | 0.74   | 2.13   | 5.48   | 11.63   | $y = 1.1998x - 0.4041$ | 0.99975 |
| Se       | 0.83   | 2.12   | 5.65   | 11.41   | $y = 1.1709x - 0.2666$ | 0.99990 |
| Tl       | 0.99   | 1.90   | 4.56   | 9.27    | $y = 0.9194x + 0.0428$ | 0.99990 |
| Ag       | 0.85   | 1.94   | 4.67   | 10.03   | $y = 1.0138x - 0.1895$ | 0.99940 |
| Au       | 0.96   | 2.06   | 4.96   | 10.22   | $y = 1.0241x - 0.0584$ | 0.99985 |
| Ir       | 0.91   | 1.96   | 5.19   | 10.92   | $y = 1.1137x - 0.2665$ | 0.99985 |
| Os       | 0.95   | 1.91   | 5.13   | 10.84   | $y = 1.1038x - 0.2595$ | 0.99970 |
| Pd       | 0.93   | 2.07   | 4.98   | 9.55    | $y = 0.9507x + 0.1043$ | 0.99955 |
| Pt       | 1.19   | 2.21   | 5.41   | 10.12   | $y = 0.9934x + 0.2623$ | 0.99955 |
| Ru       | 1.02   | 2.25   | 5.13   | 9.73    | $y = 0.9568x + 0.2267$ | 0.99935 |
| Rh       | 0.97   | 2.13   | 4.74   | 9.20    | $y = 0.9031x + 0.1962$ | 0.99955 |

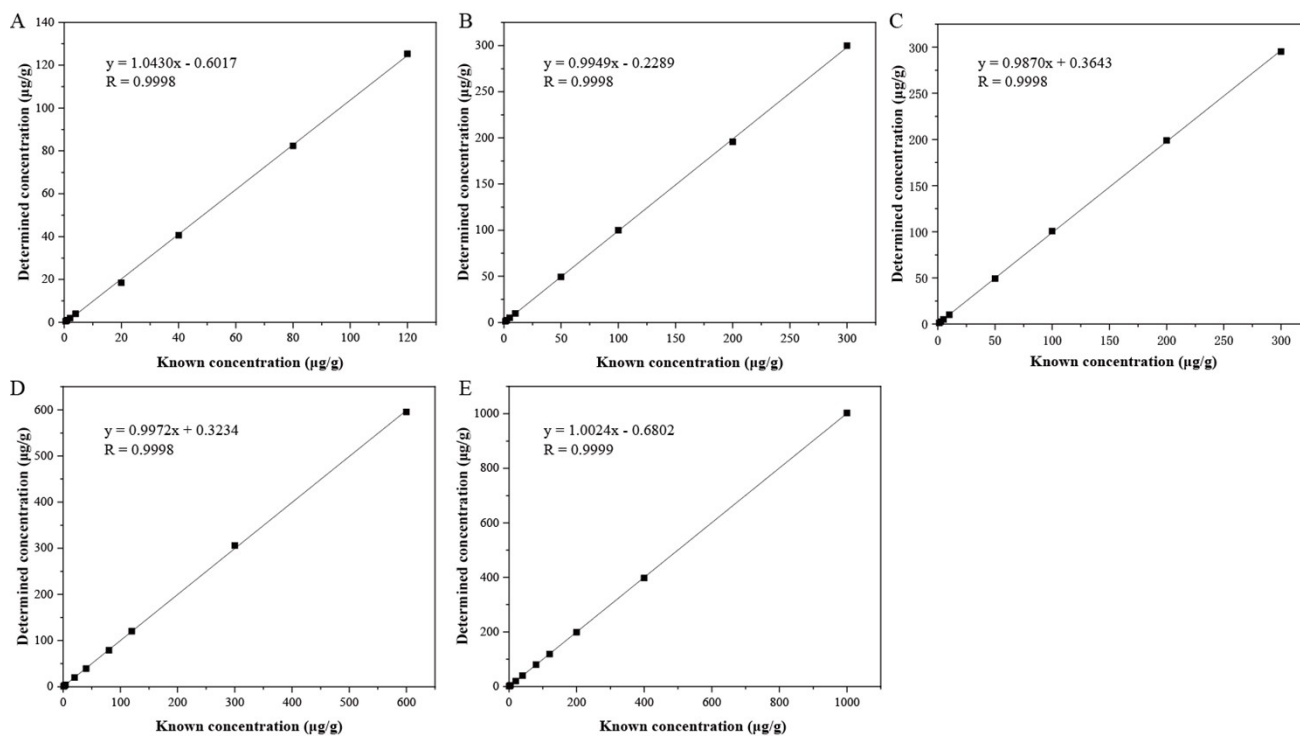

**Fig. S1** Linearity results of the proposed EDXRF method for the screening of Sb (A), Mo (B), Cu (C), Sn (D), and Cr (E)

**Table S8** Accuracy and precision results for Pd and Cd in the contezolid matrix

| Elements | Concentration       | 0.2    | 0.5    | 1.0    | 2.0    | 5.0    | 10     |
|----------|---------------------|--------|--------|--------|--------|--------|--------|
|          | ( $\mu\text{g/g}$ ) |        |        |        |        |        |        |
| Pb       | 1                   | 0.28   | 0.52   | 0.85   | 1.77   | 4.89   | 9.959  |
|          | 2                   | 0.23   | 0.41   | 1.12   | 1.69   | 4.77   | 10.3   |
|          | 3                   | 0.23   | 0.44   | 1.08   | 1.69   | 4.72   | 9.833  |
|          | 4                   | 0.19   | 0.49   | 0.87   | 1.84   | 4.46   | 10     |
|          | 5                   | 0.29   | 0.61   | 1.04   | 1.72   | 4.84   | 10.49  |
|          | 6                   | 0.20   | 0.45   | 0.91   | 1.64   | 4.67   | 10.47  |
|          | Mean                | 0.24   | 0.49   | 0.98   | 1.73   | 4.73   | 10.175 |
|          | RSD (%)             | 18.14  | 15.00  | 11.80  | 4.10   | 3.25   | 2.77   |
|          | Recovery (%)        | 117.92 | 97.20  | 97.62  | 86.37  | 94.53  | 101.75 |
| Cd       | 1                   | 0.22   | 0.47   | 1.33   | 2.12   | 5.13   | 10.01  |
|          | 2                   | 0.24   | 0.52   | 1.26   | 2.02   | 5.18   | 10.16  |
|          | 3                   | 0.23   | 0.49   | 1.28   | 2.08   | 5.08   | 10.09  |
|          | 4                   | 0.24   | 0.52   | 1.28   | 2.00   | 5.06   | 10.31  |
|          | 5                   | 0.22   | 0.54   | 1.27   | 2.04   | 5.14   | 10.25  |
|          | 6                   | 0.20   | 0.47   | 1.28   | 2.04   | 5.11   | 10.18  |
|          | Mean                | 0.22   | 0.50   | 1.28   | 2.05   | 5.12   | 10.167 |
|          | RSD (%)             | 6.66   | 5.62   | 1.92   | 2.16   | 0.88   | 1.06   |
|          | Recovery (%)        | 111.67 | 100.17 | 128.23 | 102.58 | 102.32 | 101.67 |

**Table S9** Accuracy and precision results for 19 elemental impurities in the contezolid matrix

| Elements     | Concentration<br>( $\mu\text{g/g}$ ) | 1     | 2     | 5      | 10           | Elements | Concentration<br>( $\mu\text{g/g}$ ) | 1      | 2      | 5    | 10    |
|--------------|--------------------------------------|-------|-------|--------|--------------|----------|--------------------------------------|--------|--------|------|-------|
|              |                                      |       |       |        |              |          |                                      |        |        |      |       |
| Hg           | 1                                    | 1.30  | 1.59  | 5.02   | 10.74        | As       | 1                                    | 1.27   | 1.93   | 4.98 | 10.68 |
|              | 2                                    | 0.95  | 1.85  | 4.95   | 10.86        |          | 2                                    | 0.85   | 1.90   | 5.26 | 10.61 |
|              | 3                                    | 1.03  | 1.71  | 4.90   | 10.63        |          | 3                                    | 1.13   | 1.81   | 5.11 | 10.51 |
|              | 4                                    | 1.03  | 1.78  | 4.91   | 10.54        |          | 4                                    | 1.02   | 2.06   | 4.79 | 10.92 |
|              | 5                                    | 1.14  | 1.86  | 4.84   | 10.94        |          | 5                                    | 0.86   | 1.72   | 5.15 | 10.93 |
|              | 6                                    | 1.19  | 1.78  | 4.82   | 10.87        |          | 6                                    | 1.11   | 2.11   | 5.03 | 11.45 |
|              | Mean                                 | 1.11  | 1.76  | 4.91   | 10.77        |          | Mean                                 | 1.04   | 1.92   | 5.05 | 10.85 |
|              | RSD (%)                              | 11.27 | 5.73  | 1.49   | 1.42         |          | RSD (%)                              | 15.79  | 7.78   | 3.20 | 3.12  |
| Recovery (%) | 110.66                               | 88.06 | 98.12 | 107.65 | Recovery (%) | 103.98   | 96.04                                | 101.05 | 108.50 |      |       |
| Co           | 1                                    | 0.98  | 1.45  | 5.05   | 11.38        | Ni       | 1                                    | 1.57   | 2.11   | 5.68 | 11.69 |
|              | 2                                    | 0.77  | 1.40  | 4.89   | 11.35        |          | 2                                    | 1.44   | 2.08   | 5.31 | 11.69 |
|              | 3                                    | 0.78  | 1.70  | 4.62   | 11.21        |          | 3                                    | 1.35   | 2.29   | 5.16 | 11.60 |
|              | 4                                    | 0.84  | 1.75  | 4.93   | 11.5         |          | 4                                    | 1.31   | 2.45   | 5.69 | 11.71 |
|              | 5                                    | 0.85  | 1.53  | 4.84   | 11.83        |          | 5                                    | 1.53   | 2.17   | 5.57 | 11.79 |
|              | 6                                    | 0.77  | 1.61  | 4.64   | 11.22        |          | 6                                    | 1.45   | 2.12   | 5.49 | 11.54 |
|              | Mean                                 | 0.83  | 1.57  | 4.83   | 11.415       |          | Mean                                 | 1.44   | 2.20   | 5.48 | 11.67 |
|              | RSD (%)                              | 9.65  | 8.96  | 3.49   | 2.02         |          | RSD (%)                              | 7.08   | 6.39   | 3.86 | 0.75  |
| Recovery (%) | 83.13                                | 78.62 | 96.58 | 114.15 | Recovery (%) | 144.10   | 110.15                               | 109.68 | 116.70 |      |       |
| Tl           | 1                                    | 0.92  | 1.61  | 4.61   | 9.38         | Au       | 1                                    | 1.15   | 1.76   | 5.15 | 10.87 |
|              | 2                                    | 0.86  | 1.59  | 4.78   | 9.75         |          | 2                                    | 1.16   | 1.68   | 5.22 | 10.90 |
|              | 3                                    | 0.88  | 1.65  | 4.80   | 9.68         |          | 3                                    | 1.06   | 1.85   | 5.17 | 10.44 |
|              | 4                                    | 0.96  | 1.58  | 4.68   | 9.30         |          | 4                                    | 1.05   | 1.74   | 4.97 | 11.01 |
|              | 5                                    | 0.93  | 1.67  | 4.88   | 9.39         |          | 5                                    | 1.13   | 1.87   | 5.24 | 10.63 |
|              | 6                                    | 1.01  | 1.51  | 4.80   | 9.43         |          | 6                                    | 1.19   | 1.74   | 5.21 | 10.98 |
|              | Mean                                 | 0.92  | 1.60  | 4.76   | 9.49         |          | Mean                                 | 1.12   | 1.77   | 5.16 | 10.81 |
|              | RSD (%)                              | 5.84  | 3.46  | 2.06   | 1.92         |          | RSD (%)                              | 5.14   | 4.00   | 1.90 | 2.07  |
| Recovery (%) | 92.46                                | 80.15 | 95.15 | 94.86  | Recovery (%) | 112.35   | 88.62                                | 103.14 | 108.05 |      |       |
| Pd           | 1                                    | 1.38  | 2.09  | 5.45   | 10.58        | Ir       | 1                                    | 0.93   | 1.45   | 4.92 | 9.48  |
|              | 2                                    | 1.34  | 2.07  | 5.41   | 10.58        |          | 2                                    | 1.01   | 1.32   | 5.02 | 9.18  |
|              | 3                                    | 1.38  | 2.10  | 5.45   | 10.70        |          | 3                                    | 0.75   | 1.75   | 5.11 | 9.19  |
|              | 4                                    | 1.36  | 2.09  | 5.30   | 10.74        |          | 4                                    | 1.01   | 1.51   | 4.92 | 9.55  |

|    |              |        |        |        |        |    |              |        |        |        |        |
|----|--------------|--------|--------|--------|--------|----|--------------|--------|--------|--------|--------|
|    | 5            | 1.33   | 2.18   | 5.43   | 10.68  |    | 5            | 0.90   | 1.72   | 5.13   | 9.47   |
|    | 6            | 1.40   | 2.16   | 5.41   | 10.71  |    | 6            | 0.69   | 1.76   | 4.97   | 9.72   |
|    | Mean         | 1.36   | 2.12   | 5.41   | 10.67  |    | Mean         | 0.88   | 1.58   | 5.01   | 9.43   |
|    | RSD (%)      | 2.10   | 2.17   | 1.03   | 0.64   |    | RSD (%)      | 15.25  | 11.58  | 1.84   | 2.25   |
|    | Recovery (%) | 136.37 | 105.76 | 108.17 | 106.65 |    | Recovery (%) | 88.08  | 79.22  | 100.26 | 94.31  |
| Os | 1            | 0.99   | 1.77   | 4.51   | 10.03  | Rh | 1            | 1.33   | 2.08   | 5.29   | 10.43  |
|    | 2            | 0.99   | 2.06   | 4.28   | 9.69   |    | 2            | 1.34   | 2.12   | 5.29   | 10.65  |
|    | 3            | 0.78   | 1.54   | 4.40   | 9.62   |    | 3            | 1.38   | 2.13   | 5.30   | 10.81  |
|    | 4            | 0.68   | 1.78   | 4.64   | 9.56   |    | 4            | 1.36   | 2.21   | 5.18   | 10.65  |
|    | 5            | 0.69   | 2.26   | 4.39   | 9.40   |    | 5            | 1.33   | 2.17   | 5.40   | 10.49  |
|    | 6            | 0.72   | 1.85   | 4.27   | 9.54   |    | 6            | 1.38   | 2.13   | 5.43   | 10.76  |
|    | Mean         | 0.81   | 1.87   | 4.42   | 9.64   |    | Mean         | 1.35   | 2.14   | 5.32   | 10.63  |
|    | RSD (%)      | 17.92  | 13.40  | 3.23   | 2.21   |    | RSD (%)      | 1.70   | 2.05   | 1.65   | 1.39   |
|    | Recovery (%) | 80.87  | 93.72  | 88.32  | 96.41  |    | Recovery (%) | 135.28 | 106.91 | 106.30 | 106.32 |
| Ru | 1            | 1.48   | 2.20   | 5.67   | 10.56  | Se | 1            | 1.33   | 1.93   | 4.88   | 9.90   |
|    | 2            | 1.45   | 2.19   | 5.73   | 10.61  |    | 2            | 1.13   | 1.82   | 5.01   | 9.90   |
|    | 3            | 1.44   | 2.33   | 5.74   | 10.89  |    | 3            | 1.09   | 1.92   | 5.21   | 9.92   |
|    | 4            | 1.45   | 2.28   | 5.63   | 10.83  |    | 4            | 1.33   | 1.83   | 4.78   | 10.22  |
|    | 5            | 1.51   | 2.24   | 5.77   | 10.69  |    | 5            | 1.20   | 1.78   | 4.82   | 9.73   |
|    | 6            | 1.50   | 2.22   | 5.78   | 10.53  |    | 6            | 1.22   | 1.84   | 5.06   | 10.14  |
|    | Mean         | 1.47   | 2.24   | 5.72   | 10.69  |    | Mean         | 1.22   | 1.85   | 4.96   | 9.97   |
|    | RSD (%)      | 2.01   | 2.38   | 1.05   | 1.38   |    | RSD (%)      | 8.02   | 3.24   | 3.35   | 1.83   |
|    | Recovery (%) | 147.17 | 112.01 | 114.38 | 106.85 |    | Recovery (%) | 121.63 | 92.68  | 99.16  | 99.69  |
| Ag | 1            | 1.22   | 1.98   | 5.12   | 10.07  | Pt | 1            | 1.02   | 1.90   | 4.86   | 10.16  |
|    | 2            | 1.18   | 1.90   | 4.97   | 10.06  |    | 2            | 0.90   | 1.94   | 5.15   | 10.35  |
|    | 3            | 1.08   | 1.88   | 5.09   | 10.13  |    | 3            | 1.02   | 2.05   | 5.12   | 10.00  |
|    | 4            | 1.20   | 1.92   | 5.02   | 10.10  |    | 4            | 0.96   | 2.25   | 5.03   | 10.14  |
|    | 5            | 1.22   | 1.93   | 5.07   | 10.06  |    | 5            | 0.89   | 2.38   | 5.05   | 10.45  |
|    | 6            | 1.26   | 1.98   | 5.11   | 10.18  |    | 6            | 1.03   | 2.05   | 5.05   | 10.37  |
|    | Mean         | 1.19   | 1.93   | 5.06   | 10.10  |    | Mean         | 0.97   | 2.10   | 5.04   | 10.24  |
|    | RSD (%)      | 4.97   | 2.09   | 1.09   | 0.47   |    | RSD (%)      | 6.40   | 8.74   | 2.04   | 1.69   |
|    | Recovery (%) | 119.15 | 96.65  | 101.26 | 101.00 |    | Recovery (%) | 96.97  | 104.77 | 100.84 | 102.44 |
| Sb | 1            | 1.26   | 1.95   | 5.06   | 10.32  | Mo | 1            | 1.37   | 2.36   | 5.99   | 11.87  |
|    | 2            | 1.26   | 2.04   | 5.07   | 10.00  |    | 2            | 1.42   | 2.43   | 6.03   | 11.89  |
|    | 3            | 1.14   | 2.10   | 5.49   | 10.42  |    | 3            | 1.38   | 2.44   | 6.15   | 11.69  |

|    |              |        |        |        |        |    |              |        |        |        |        |
|----|--------------|--------|--------|--------|--------|----|--------------|--------|--------|--------|--------|
|    | 4            | 1.36   | 1.95   | 5.03   | 10.18  |    | 4            | 1.41   | 2.37   | 5.95   | 11.89  |
|    | 5            | 1.23   | 2.06   | 5.29   | 10.02  |    | 5            | 1.43   | 2.41   | 6.06   | 11.53  |
|    | 6            | 1.33   | 2.03   | 5.07   | 10.00  |    | 6            | 1.42   | 2.43   | 6.11   | 11.89  |
|    | Mean         | 1.26   | 2.02   | 5.17   | 10.16  |    | Mean         | 1.40   | 2.41   | 6.05   | 11.79  |
|    | RSD (%)      | 6.04   | 3.00   | 3.56   | 1.79   |    | RSD (%)      | 1.83   | 1.41   | 1.21   | 1.28   |
|    | Recovery (%) | 126.08 | 101.13 | 103.41 | 101.57 |    | Recovery (%) | 140.48 | 120.33 | 120.96 | 117.93 |
| Sn | 1            | 1.32   | 1.98   | 5.20   | 10.22  | Cr | 1            | 1.27   | 2.04   | 5.92   | 11.62  |
|    | 2            | 1.29   | 2.03   | 5.00   | 10.24  |    | 2            | 0.82   | 2.10   | 5.92   | 11.55  |
|    | 3            | 1.35   | 1.99   | 5.20   | 10.12  |    | 3            | 1.14   | 2.22   | 6.57   | 11.48  |
|    | 4            | 1.34   | 2.03   | 5.32   | 10.18  |    | 4            | 1.06   | 2.32   | 6.18   | 11.77  |
|    | 5            | 1.23   | 1.92   | 5.13   | 10.20  |    | 5            | 1.27   | 1.90   | 6.12   | 11.21  |
|    | 6            | 1.19   | 2.13   | 5.26   | 10.20  |    | 6            | 1.07   | 2.33   | 5.80   | 11.39  |
|    | Mean         | 1.29   | 2.01   | 5.18   | 10.19  |    | Mean         | 1.11   | 2.15   | 6.09   | 11.50  |
|    | RSD (%)      | 4.87   | 3.37   | 2.12   | 0.41   |    | RSD (%)      | 15.19  | 7.98   | 4.50   | 1.68   |
|    | Recovery (%) | 128.68 | 100.69 | 103.67 | 101.93 |    | Recovery (%) | 110.50 | 107.57 | 121.72 | 115.03 |
| Cu | 1            | 0.79   | 1.72   | 5.75   | 11.80  |    |              |        |        |        |        |
|    | 2            | 0.81   | 1.83   | 5.59   | 11.47  |    |              |        |        |        |        |
|    | 3            | 0.97   | 1.79   | 5.44   | 11.38  |    |              |        |        |        |        |
|    | 4            | 0.97   | 2.17   | 5.23   | 11.33  |    |              |        |        |        |        |
|    | 5            | 0.72   | 1.91   | 5.61   | 11.73  |    |              |        |        |        |        |
|    | 6            | 0.81   | 2.20   | 5.51   | 11.71  |    |              |        |        |        |        |
|    | Mean         | 0.85   | 1.94   | 5.52   | 11.57  |    |              |        |        |        |        |
|    | RSD (%)      | 12.17  | 10.46  | 3.22   | 1.74   |    |              |        |        |        |        |
|    | Recovery (%) | 84.50  | 96.79  | 110.41 | 115.70 |    |              |        |        |        |        |



**Table S10** Accuracy and precision results for Pd and Cd in the aztreonam matrix

| Elements | Concentration<br>( $\mu\text{g/g}$ ) | Concentration |        |        |        |        |       |
|----------|--------------------------------------|---------------|--------|--------|--------|--------|-------|
|          |                                      | 0.2           | 0.5    | 1.0    | 2.0    | 5.0    | 10    |
| Pb       | 1                                    | 0.22          | 0.75   | 1.10   | 2.22   | 5.00   | 9.59  |
|          | 2                                    | 0.32          | 0.73   | 1.02   | 2.11   | 5.22   | 9.24  |
|          | 3                                    | 0.29          | 0.61   | 0.96   | 2.06   | 5.36   | 9.11  |
|          | 4                                    | 0.25          | 0.61   | 1.25   | 2.22   | 5.12   | 9.38  |
|          | 5                                    | 0.25          | 0.75   | 1.20   | 2.23   | 5.30   | 9.53  |
|          | 6                                    | 0.29          | 0.58   | 1.09   | 2.16   | 5.02   | 9.19  |
|          | Mean                                 | 0.27          | 0.67   | 1.10   | 2.17   | 5.17   | 9.34  |
|          | RSD (%)                              | 13.10         | 12.17  | 9.84   | 3.21   | 2.91   | 2.06  |
|          | Recovery (%)                         | 135.22        | 134.52 | 110.32 | 108.25 | 103.41 | 93.41 |
| Cd       | 1                                    | 0.20          | 0.43   | 0.98   | 1.97   | 5.01   | 9.89  |
|          | 2                                    | 0.24          | 0.49   | 0.91   | 1.98   | 4.95   | 9.96  |
|          | 3                                    | 0.19          | 0.46   | 0.92   | 2.01   | 5.01   | 9.99  |
|          | 4                                    | 0.22          | 0.51   | 0.95   | 2.00   | 4.97   | 9.81  |
|          | 5                                    | 0.20          | 0.50   | 0.93   | 2.11   | 4.99   | 9.80  |
|          | 6                                    | 0.27          | 0.45   | 0.91   | 2.03   | 5.05   | 9.97  |
|          | Mean                                 | 0.22          | 0.47   | 0.93   | 2.02   | 5.00   | 9.90  |
|          | RSD (%)                              | 13.49         | 6.43   | 2.95   | 2.43   | 0.72   | 0.84  |
|          | Recovery (%)                         | 110.17        | 94.93  | 93.22  | 100.85 | 99.93  | 99.05 |

**Table S11** Accuracy and precision results for 20 elemental impurities in the aztreonam matrix

| Elements | Concentration<br>( $\mu\text{g/g}$ ) | 1     | 2     | 5      | 10     | Elements | Concentration<br>( $\mu\text{g/g}$ ) | 1      | 2      | 5      | 10     |
|----------|--------------------------------------|-------|-------|--------|--------|----------|--------------------------------------|--------|--------|--------|--------|
|          |                                      |       |       |        |        |          |                                      |        |        |        |        |
| Hg       | 1                                    | 0.71  | 1.85  | 4.19   | 9.76   | As       | 1                                    | 0.93   | 1.73   | 4.51   | 10.27  |
|          | 2                                    | 0.73  | 1.98  | 4.09   | 9.91   |          | 2                                    | 1.06   | 2.15   | 4.47   | 10.46  |
|          | 3                                    | 0.82  | 1.97  | 4.19   | 10.29  |          | 3                                    | 0.92   | 1.82   | 4.33   | 10.17  |
|          | 4                                    | 0.73  | 1.96  | 4.30   | 10.22  |          | 4                                    | 0.84   | 1.70   | 4.56   | 10.17  |
|          | 5                                    | 0.90  | 1.97  | 4.26   | 10.23  |          | 5                                    | 1.04   | 1.72   | 4.27   | 10.75  |
|          | 6                                    | 0.85  | 1.95  | 4.18   | 10.25  |          | 6                                    | 0.86   | 1.75   | 4.35   | 10.38  |
|          | Mean                                 | 0.79  | 1.95  | 4.20   | 10.11  |          | Mean                                 | 0.94   | 1.81   | 4.42   | 10.37  |
|          | RSD (%)                              | 9.99  | 2.59  | 1.75   | 2.18   |          | RSD (%)                              | 9.88   | 9.43   | 2.55   | 2.12   |
|          | Recovery (%)                         | 79.20 | 97.40 | 84.02  | 101.08 |          | Recovery (%)                         | 94.30  | 90.61  | 88.35  | 103.68 |
| Co       | 1                                    | 0.77  | 1.78  | 5.16   | 9.98   | V        | 1                                    | 1.27   | 2.13   | 5.20   | 10.74  |
|          | 2                                    | 0.72  | 1.81  | 5.12   | 10.20  |          | 2                                    | 1.05   | 2.26   | 5.53   | 10.20  |
|          | 3                                    | 0.80  | 1.84  | 5.06   | 10.06  |          | 3                                    | 1.16   | 2.27   | 5.48   | 10.18  |
|          | 4                                    | 0.73  | 1.83  | 5.06   | 10.14  |          | 4                                    | 1.06   | 2.28   | 5.56   | 10.43  |
|          | 5                                    | 0.82  | 1.77  | 5.31   | 9.88   |          | 5                                    | 1.23   | 2.01   | 5.50   | 10.12  |
|          | 6                                    | 0.73  | 1.89  | 5.22   | 10.15  |          | 6                                    | 1.05   | 2.25   | 5.27   | 10.39  |
|          | Mean                                 | 0.76  | 1.82  | 5.16   | 10.07  |          | Mean                                 | 1.14   | 2.20   | 5.42   | 10.34  |
|          | RSD (%)                              | 5.26  | 2.43  | 1.93   | 1.21   |          | RSD (%)                              | 8.84   | 4.92   | 2.75   | 2.22   |
|          | Recovery (%)                         | 76.28 | 91.08 | 103.12 | 100.67 |          | Recovery (%)                         | 113.60 | 109.91 | 108.47 | 103.43 |
| Ni       | 1                                    | 0.94  | 2.08  | 5.06   | 10.01  | Tl       | 1                                    | 0.95   | 1.90   | 4.70   | 10.38  |
|          | 2                                    | 0.77  | 1.86  | 5.07   | 10.15  |          | 2                                    | 0.75   | 1.91   | 5.00   | 10.50  |
|          | 3                                    | 0.81  | 1.94  | 5.21   | 9.78   |          | 3                                    | 0.71   | 1.92   | 4.67   | 10.49  |
|          | 4                                    | 0.74  | 1.96  | 5.07   | 10.14  |          | 4                                    | 0.82   | 1.96   | 4.68   | 10.63  |
|          | 5                                    | 0.93  | 1.84  | 5.13   | 10.02  |          | 5                                    | 0.79   | 1.92   | 4.81   | 10.72  |
|          | 6                                    | 0.86  | 1.90  | 4.95   | 10.06  |          | 6                                    | 0.71   | 1.95   | 4.65   | 10.45  |
|          | Mean                                 | 0.84  | 1.93  | 5.08   | 10.03  |          | Mean                                 | 0.79   | 1.93   | 4.75   | 10.53  |
|          | RSD (%)                              | 10.02 | 4.49  | 1.67   | 1.33   |          | RSD (%)                              | 11.46  | 1.16   | 2.86   | 1.19   |
|          | Recovery (%)                         | 84.02 | 96.43 | 101.64 | 100.27 |          | Recovery (%)                         | 78.81  | 96.39  | 95.05  | 105.30 |
| Au       | 1                                    | 0.84  | 1.84  | 4.68   | 9.05   | Pd       | 1                                    | 0.95   | 2.03   | 5.28   | 9.21   |
|          | 2                                    | 0.72  | 1.75  | 4.89   | 8.91   |          | 2                                    | 0.95   | 2.01   | 5.32   | 9.30   |
|          | 3                                    | 0.82  | 1.76  | 4.52   | 9.05   |          | 3                                    | 0.98   | 2.00   | 5.29   | 9.33   |
|          | 4                                    | 0.87  | 1.63  | 4.68   | 9.20   |          | 4                                    | 0.95   | 2.05   | 5.39   | 9.27   |

|    |              |       |        |        |        |    |              |       |        |        |       |
|----|--------------|-------|--------|--------|--------|----|--------------|-------|--------|--------|-------|
|    | 5            | 0.83  | 1.78   | 4.46   | 9.03   |    | 5            | 0.97  | 2.00   | 5.24   | 9.16  |
|    | 6            | 0.79  | 1.67   | 4.44   | 8.99   |    | 6            | 0.89  | 2.08   | 5.30   | 9.16  |
|    | Mean         | 0.81  | 1.74   | 4.61   | 9.04   |    | Mean         | 0.95  | 2.03   | 5.30   | 9.24  |
|    | RSD (%)      | 6.51  | 4.38   | 3.73   | 1.07   |    | RSD (%)      | 3.18  | 1.62   | 0.94   | 0.77  |
|    | Recovery (%) | 81.04 | 86.89  | 92.28  | 90.39  |    | Recovery (%) | 94.65 | 101.38 | 106.02 | 92.39 |
| Ir | 1            | 0.93  | 1.88   | 4.67   | 10.28  | Os | 1            | 0.88  | 1.57   | 4.48   | 9.49  |
|    | 2            | 0.81  | 1.72   | 4.69   | 10.87  |    | 2            | 0.79  | 1.54   | 4.91   | 9.88  |
|    | 3            | 0.66  | 1.95   | 4.62   | 10.34  |    | 3            | 0.76  | 1.57   | 4.36   | 9.10  |
|    | 4            | 0.97  | 1.61   | 4.32   | 10.89  |    | 4            | 0.90  | 1.44   | 5.03   | 9.17  |
|    | 5            | 0.78  | 1.66   | 4.50   | 10.83  |    | 5            | 0.67  | 1.56   | 4.49   | 9.10  |
|    | 6            | 0.70  | 1.53   | 4.15   | 10.18  |    | 6            | 0.70  | 1.79   | 4.46   | 10.02 |
|    | Mean         | 0.81  | 1.73   | 4.49   | 10.57  |    | Mean         | 0.78  | 1.58   | 4.62   | 9.46  |
|    | RSD (%)      | 15.19 | 9.25   | 4.82   | 3.16   |    | RSD (%)      | 11.83 | 7.21   | 5.94   | 4.33  |
|    | Recovery (%) | 80.76 | 86.37  | 89.84  | 105.65 |    | Recovery (%) | 78.21 | 78.88  | 92.42  | 94.61 |
| Rh | 1            | 0.92  | 2.01   | 5.16   | 9.16   | Ru | 1            | 0.96  | 2.16   | 5.45   | 9.61  |
|    | 2            | 0.91  | 2.04   | 5.09   | 9.17   |    | 2            | 0.92  | 2.19   | 5.34   | 9.67  |
|    | 3            | 0.96  | 2.12   | 5.20   | 9.14   |    | 3            | 0.98  | 2.09   | 5.45   | 9.63  |
|    | 4            | 1.01  | 2.06   | 5.10   | 8.97   |    | 4            | 0.98  | 2.16   | 5.36   | 9.59  |
|    | 5            | 0.95  | 2.04   | 5.17   | 9.14   |    | 5            | 1.00  | 2.13   | 5.41   | 9.66  |
|    | 6            | 1.00  | 2.05   | 5.29   | 9.33   |    | 6            | 1.07  | 2.18   | 5.47   | 9.72  |
|    | Mean         | 0.96  | 2.06   | 5.17   | 9.15   |    | Mean         | 0.99  | 2.15   | 5.41   | 9.65  |
|    | RSD (%)      | 4.04  | 1.84   | 1.44   | 1.28   |    | RSD (%)      | 5.05  | 1.71   | 0.93   | 0.48  |
|    | Recovery (%) | 95.72 | 102.80 | 103.35 | 91.49  |    | Recovery (%) | 98.63 | 107.55 | 108.26 | 96.45 |
| Se | 1            | 0.89  | 1.72   | 4.11   | 8.77   | Ag | 1            | 8.86  | 4.72   | 1.85   | 0.92  |
|    | 2            | 0.89  | 1.80   | 3.99   | 9.09   |    | 2            | 8.91  | 4.76   | 1.87   | 0.81  |
|    | 3            | 0.78  | 1.77   | 4.17   | 8.72   |    | 3            | 8.90  | 4.88   | 1.91   | 0.79  |
|    | 4            | 0.89  | 1.75   | 4.16   | 9.05   |    | 4            | 8.80  | 4.89   | 1.85   | 0.83  |
|    | 5            | 0.80  | 1.84   | 4.21   | 8.94   |    | 5            | 8.75  | 4.82   | 1.92   | 0.86  |
|    | 6            | 1.03  | 1.88   | 4.40   | 8.99   |    | 6            | 8.80  | 4.83   | 1.93   | 0.86  |
|    | Mean         | 0.88  | 1.79   | 4.18   | 8.93   |    | Mean         | 8.84  | 4.82   | 1.89   | 0.84  |
|    | RSD (%)      | 9.96  | 3.23   | 3.21   | 1.72   |    | RSD (%)      | 0.71  | 1.40   | 1.87   | 5.47  |
|    | Recovery (%) | 88.07 | 89.63  | 83.51  | 89.27  |    | Recovery (%) | 88.38 | 96.32  | 94.38  | 84.42 |
| Pt | 1            | 0.77  | 2.24   | 4.53   | 9.59   | Sb | 1            | 0.90  | 2.19   | 4.80   | 8.86  |
|    | 2            | 0.85  | 2.01   | 4.31   | 9.30   |    | 2            | 0.89  | 2.34   | 4.51   | 8.53  |
|    | 3            | 0.72  | 2.27   | 4.22   | 9.60   |    | 3            | 0.89  | 2.25   | 5.02   | 8.72  |

|    |              |        |        |        |        |    |              |       |        |        |        |
|----|--------------|--------|--------|--------|--------|----|--------------|-------|--------|--------|--------|
|    | 4            | 0.98   | 2.29   | 4.30   | 9.78   |    | 4            | 1.01  | 2.35   | 5.00   | 8.75   |
|    | 5            | 0.96   | 2.05   | 4.27   | 9.38   |    | 5            | 0.83  | 2.23   | 4.93   | 8.75   |
|    | 6            | 0.88   | 2.19   | 4.21   | 9.51   |    | 6            | 1.00  | 2.26   | 4.87   | 8.63   |
|    | Mean         | 0.86   | 2.17   | 4.31   | 9.53   |    | Mean         | 0.92  | 2.27   | 4.85   | 8.71   |
|    | RSD (%)      | 11.86  | 5.42   | 2.70   | 1.80   |    | RSD (%)      | 7.87  | 2.66   | 3.88   | 1.31   |
|    | Recovery (%) | 86.00  | 108.68 | 86.11  | 95.25  |    | Recovery (%) | 92.02 | 113.43 | 97.09  | 87.07  |
| Mo | 1            | 1.09   | 2.19   | 4.91   | 10.04  | Sn | 1            | 0.99  | 2.07   | 5.10   | 9.14   |
|    | 2            | 1.08   | 2.25   | 4.94   | 10.01  |    | 2            | 0.82  | 2.00   | 5.09   | 9.11   |
|    | 3            | 1.03   | 2.22   | 4.96   | 10.10  |    | 3            | 0.92  | 1.97   | 5.07   | 9.14   |
|    | 4            | 1.08   | 2.22   | 4.96   | 10.12  |    | 4            | 0.84  | 2.13   | 5.01   | 9.11   |
|    | 5            | 1.06   | 2.23   | 5.03   | 10.09  |    | 5            | 0.92  | 2.01   | 5.14   | 9.09   |
|    | 6            | 1.04   | 2.22   | 4.98   | 9.98   |    | 6            | 0.93  | 1.97   | 5.09   | 9.14   |
|    | Mean         | 1.06   | 2.22   | 4.96   | 10.06  |    | Mean         | 0.90  | 2.03   | 5.08   | 9.12   |
|    | RSD (%)      | 2.39   | 0.82   | 0.79   | 0.55   |    | RSD (%)      | 6.83  | 3.04   | 0.82   | 0.23   |
|    | Recovery (%) | 106.30 | 111.07 | 99.23  | 100.57 |    | Recovery (%) | 90.20 | 101.25 | 101.66 | 91.22  |
| Cr | 1            | 0.90   | 1.96   | 5.40   | 10.51  | Cu | 1            | 0.75  | 1.57   | 4.45   | 10.17  |
|    | 2            | 1.13   | 2.69   | 5.48   | 10.18  |    | 2            | 0.81  | 1.69   | 4.35   | 9.86   |
|    | 3            | 1.24   | 2.49   | 5.37   | 10.59  |    | 3            | 0.73  | 1.90   | 4.27   | 9.91   |
|    | 4            | 1.22   | 2.22   | 5.30   | 10.77  |    | 4            | 0.79  | 1.61   | 4.59   | 9.87   |
|    | 5            | 1.30   | 2.53   | 5.29   | 10.21  |    | 5            | 0.91  | 1.76   | 4.39   | 10.30  |
|    | 6            | 1.13   | 2.37   | 5.92   | 10.82  |    | 6            | 0.67  | 1.71   | 4.28   | 10.07  |
|    | Mean         | 1.15   | 2.38   | 5.46   | 10.51  |    | Mean         | 0.78  | 1.71   | 4.39   | 10.03  |
|    | RSD (%)      | 12.36  | 10.88  | 4.32   | 2.58   |    | RSD (%)      | 10.49 | 6.82   | 2.73   | 1.80   |
|    | Recovery (%) | 115.15 | 118.86 | 109.18 | 105.13 |    | Recovery (%) | 77.88 | 85.27  | 87.78  | 100.30 |

**Table S12** Determination of elemental impurities in drug products.

| Elements | Concentration (µg /g) |                |             |                |           |                |           |                |                       |                |                       |                |
|----------|-----------------------|----------------|-------------|----------------|-----------|----------------|-----------|----------------|-----------------------|----------------|-----------------------|----------------|
|          | Avibactam 1           |                | Avibactam 2 |                | Zafatek 1 |                | Zafatek 2 |                | Abiraterone acetate 1 |                | Abiraterone acetate 2 |                |
|          | ICP-MS                | Present Method | ICP-MS      | Present Method | ICP-MS    | Present Method | ICP-MS    | Present Method | ICP-MS                | Present Method | ICP-MS                | Present Method |
| Cd       | -                     | -              | -           | -              | -         | -              | -         | -              | -                     | -              | -                     | -              |
| Pb       | 0.01                  | -              | 0.02        | -              | 0.02      | -              | 0.04      | -              | 0.02                  | -              | 0.01                  | -              |
| As       | -                     | -              | -           | -              | 0.01      | -              | -         | -              | -                     | -              | -                     | -              |
| Hg       | -                     | -              | -           | -              | -         | -              | -         | -              | -                     | -              | -                     | -              |
| Co       | 0.01                  | -              | 0.01        | -              | -         | -              | 0.01      | -              | -                     | -              | -                     | -              |
| V        | 0.01                  | -              | 0.01        | -              | 0.01      | -              | 0.01      | -              | -                     | -              | -                     | -              |
| Ni       | 0.23                  | 0.30           | 0.31        | 0.36           | 2.22      | 2.61           | 0.50      | 0.60           | 0.01                  | -              | 0.01                  | -              |
| Tl       | -                     | -              | -           | -              | -         | -              | -         | -              | -                     | -              | -                     | -              |
| Au       | -                     | -              | -           | -              | 0.01      | -              | -         | -              | -                     | -              | -                     | -              |
| Pd       | 1.30                  | 1.30           | 1.76        | 1.64           | -         | -              | -         | -              | 11.03                 | 10.16          | 9.36                  | 9.01           |
| Ir       | -                     | -              | -           | -              | -         | -              | -         | -              | -                     | -              | -                     | -              |
| Os       | -                     | -              | -           | -              | -         | -              | 0.97      | 0.86           | -                     | -              | -                     | -              |
| Rh       | -                     | -              | -           | -              | -         | -              | -         | -              | -                     | -              | -                     | -              |
| Ru       | -                     | -              | -           | -              | -         | -              | -         | -              | -                     | -              | -                     | -              |
| Se       | -                     | -              | -           | -              | -         | -              | -         | -              | 0.01                  | -              | -                     | -              |
| Ag       | -                     | -              | -           | -              | -         | -              | -         | -              | -                     | -              | -                     | -              |
| Pt       | -                     | -              | -           | -              | -         | -              | -         | -              | 0.00                  | -              | -                     | -              |
| Sb       | -                     | -              | -           | -              | 0.02      | -              | 0.00      | -              | -                     | -              | -                     | -              |
| Mo       | 0.02                  | -              | 0.05        | -              | 0.05      | -              | 0.07      | -              | 0.00                  | -              | -                     | -              |
| Cu       | 0.17                  | -              | -           | -              | 0.13      | -              | 0.12      | -              | -                     | -              | 0.10                  | -              |
| Sn       | 0.12                  | 0.12           | 0.10        | 0.13           | 0.07      | -              | 0.02      | -              | 0.12                  | 0.10           | 0.13                  | 0.11           |
| Cr       | 2.12                  | 2.21           | 1.54        | 1.28           | 0.82      | 0.53           | 1.14      | 0.97           | 0.23                  | -              | 0.13                  | -              |
